# Supplementary material
Source: PubMed Central journal article supplement (PMC3520540)
Supplement: supp_M027193_jlr.M027193-1.pdf [file supp_M027193_jlr.M027193-1.pdf]

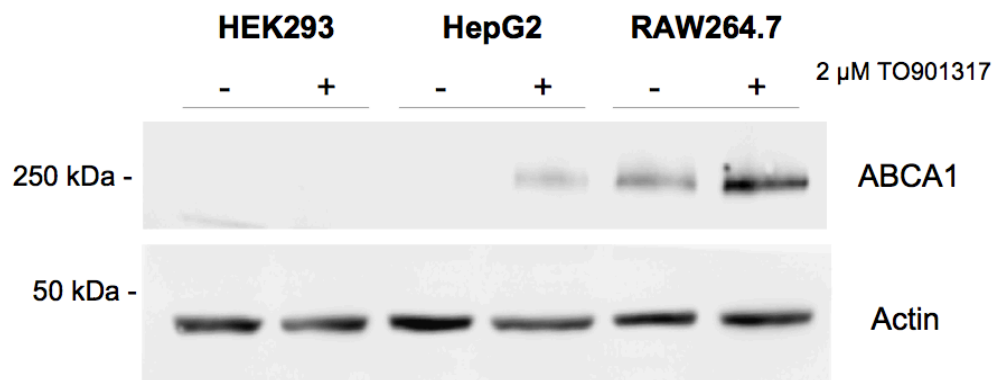

**Supplementary Figure 1. Endogenous ABCA1 protein in cell culture models.**

Cell lysates from HEK293, HepG2 and RAW264.7 cells under basal (-) and 2 μM TO901317 stimulated (+) conditions were separated by SDS-PAGE and subject to western blot analysis for ABCA1 and actin as a loading control.
