# Supplementary material
Source: PubMed Central journal article supplement (PMC3520540)
Supplement: supp_M027193_jlr.M027193-2.pdf [file supp_M027193_jlr.M027193-2.pdf]

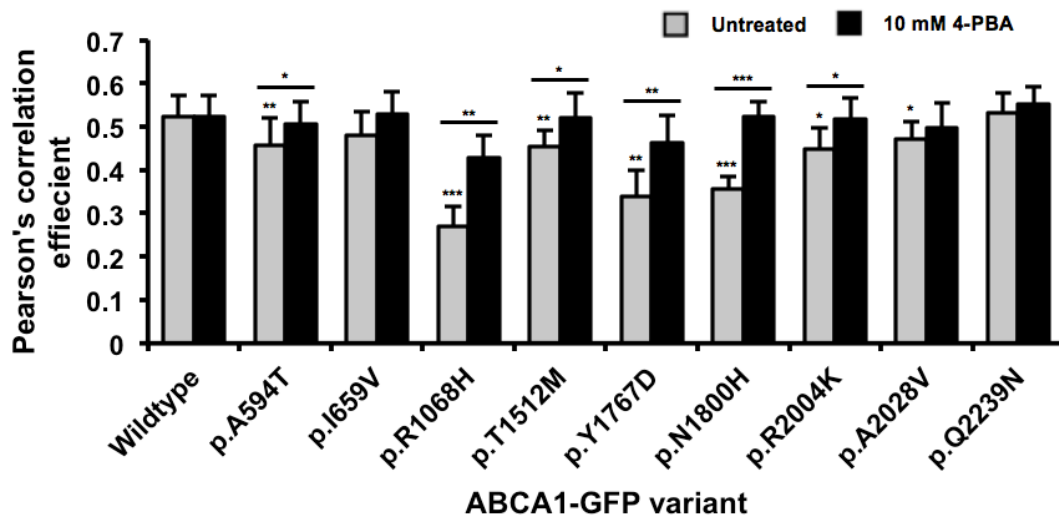

**Supplementary Figure 2. 4-PBA increases the co-localisation of ABCA1-GFP to the plasma membrane in transfected HEK293 cells.** Co-localisation of ABCA1-GFP signal with plasma membrane signal was assessed in confocal images of transfected HEK293 cells by calculating the Pearson's correlation coefficient using the Colocalisation Finder plugin of ImageJ. Data represents mean + SEM for at least seven images taken from two independent experiments for each genotype treated and untreated. \* $p < 0.05$ , \*\* $p < 0.01$ , \*\*\* $p < 0.001$  for values compared to the untreated wildtype value (symbols directly above error bars) and for the treated versus the untreated value of the same genotype (symbols above lines).
