# Supplementary material
Source: PubMed Central journal article supplement (PMC3520540)
Supplement: supp_M027193_jlr.M027193-3.pdf [file supp_M027193_jlr.M027193-3.pdf]

**Supplementary Table 1. Primer pairs used for ABCA1 gene amplification**

| Exon | Forward primer (5' → 3')                                        | Reverse primer (5' → 3')                                     | Amplicon size (bp) |
|------|-----------------------------------------------------------------|--------------------------------------------------------------|--------------------|
| 1    | AGC ACA GGC TTT GAC CGA TAG                                     | CCA TCT GAG TTG CAA GTG GTG                                  | 431                |
| 2    | CAT GAT CCA TTG AGA AGC AG                                      | CAC AGT CCT GTG TCC ATA AG                                   | 448                |
| 3    | CCA GAT CCC AGT GGC ATT GGA                                     | CCA TTG GTG AGT CTC AGG CAA                                  | 203                |
| 4    | AAA TGG AGC CTC AAA ATC GCT<br>TCA                              | TCC AGC CAT TCA AAA TTC TCC<br>AGA                           | 303                |
| 5    | GCA GTC ACT TCT GTA AAG CAG                                     | TCT CTT TCC CTG GTG CAG GTC                                  | 256                |
| 6    | GCC AGG CAA CTG TTG ATC ATC                                     | GCT GCA CAA CGT AAT TGC CAT C                                | 297                |
| 7    | GAC CCA GCT TCC AAT CTT CAT AA                                  | CTC ACA TTC CGA AAG CAT TAG                                  | 294                |
| 8    | GTT AGG AGT CGG TTT CTT GTT TG                                  | TCT TGC CAG ACT CAG GAA TGA                                  | 294                |
| 9    | CTG GCA AGC TCA TCC CAA GG                                      | CAG GCC AAG GCC AGA ACT AAG                                  | 481                |
| 10   | CCA ACT GAG GCT CAG ATA AG                                      | ACC TCT GAA GCT ACC TTG AG                                   | 371                |
| 11   | CTG ATG CAG ACC AGA GCT GG                                      | CAC CAT GGC CTG TAC TTC TG                                   | 488                |
| 12   | TGC TCC TCA AGA TTT AGT TGG                                     | TGA TCC CAG CAA CAG ATT CA                                   | 275                |
| 13   | CCT GGC TGC CAA CGT TCT CAT G                                   | CTG GAC CTC CCC AAG ACC AGG                                  | 292                |
| 14   | GAA TGG TTG ATT ACC TGT GGT<br>TTG                              | AAC TGG TTA AAA ACA GTG GCT<br>TGC                           | 243                |
| 15   | ACC CTG GCT CAC GTG TGCT                                        | CCT TAG CCC GTG TTG AGC TA                                   | 342                |
| 16   | CAA GTG AGT GCT TGG GAT TG                                      | TGC TTT TAT TCA GGG ACT CCA                                  | 350                |
| 17   | ACT TCT GCA CCT TAT GAT TGAT C                                  | GAA AGG ACA TCA GCT AGA AGT C                                | 386                |
| 18   | ACA GAG GTG CAG AAT GTA CG                                      | AAG GCA GGA GAC ATC GCT T                                    | 385                |
| 19   | CCA ACA TCA GTA CCC AAA TAG G                                   | CAT TCG GCA ACT CCT CAT GTG                                  | 480                |
| 20   | CTC TGC AGA CTG AAT GGA GCA                                     | CTC CTC CCA TGA TGG CAT GA                                   | 280                |
| 21   | TGG TTG CTC ACT GTT GTT CTA C                                   | AGC CAG GGA CAA GTT TCT GTT A                                | 450                |
| 22   | TTG GTA ACA GAA ACT TGT CCC TG                                  | CTC TCT CAG TCC ATT TAC TCA GA                               | 281                |
| 23   | CAC TGT GAC AAA TCA GAA CTG<br>AG                               | CAT TCA CAG CCA GCA AGT CCT GG                               | 352                |
| 24   | TGA ACT AGA CAT GTA GCC AGG                                     | CAG CAG CAA ACC TTG AGT CAG                                  | 541                |
| 25   | CTG AGT TGA TTG AGC CAT CTT TG<br>CCC AGG TAA CTC TGA GAA AGT G | CCT TAG GAC ATT TGG CCT TG<br>CTA TCA CCT TGG CTA AAG GCC AT | 295<br>617         |
| 26   |                                                                 |                                                              |                    |
| 27   | CCC AGG TAA CTC TGA GAA AGT G                                   | CTA TCA CCT TGG CTA AAG GCC AT                               | 617                |
| 28   | CTT CAG ACA CAT GCC TTC AAG                                     | TGC TAT CCT GCC TTC ACT GG                                   | 338                |
| 29   | CAG CTG CCA AGA ATG CCT TG                                      | TCT GAA GTC CAT TCC CTT GG                                   | 380                |
| 30   | CAG AGT CTG AGA TCC TTC TG                                      | CAC AAT GTG GCA TGC AGT TG                                   | 360                |
| 31   | CAC AGT GTA CAA GGC TGT TG                                      | CCT GCT TCC AAG CGG AAG CT                                   | 440                |
| 32   | CAC TGT GGA CAT GGT CAC TG                                      | CAG CCT TGA AGC TGA CAA CTG                                  | 386                |
| 33   | CTA CAA GGC CAG CTG ATT CTA G                                   | ACT GAG CCA TGA TGC TCT AGG                                  | 394                |
| 34   | CTG CTG ATG ATA CTG TGC ACC<br>CCA CT                           | TCA TCC TAT ACC CAG CAG CTA CA                               | 227                |
| 35   | GTG AAC AGT CAC AAC TGA                                         | ACT ACA CCG TAC TGC CTC ACT                                  | 266                |
| 36   | GTC AGT GAT CAC TAT GTC C                                       | AAC GGT CTC TGC AGC TGT TC                                   | 460                |
| 37   | CCA TGT CCT CAC TGA TTG AG                                      | CAT ATC AAT CCA TGG CCC TG                                   | 307                |
| 38   | CAG AGT TAC TCT CCA ATA TG                                      | CAG CAG TGT CAA TCC ACT G                                    | 598                |
| 39   | CAG AGT TAC TCT CCA ATA TG                                      | CAG CAG TGT CAA TCC ACT G                                    | 598                |
| 40   | ATC ATC AGC TAT GCC TGC TGC                                     | GAA CAT CCT GTG CTT AGT CAC C                                | 424                |
| 41   | CCT TGT CAT GGG TGA TAG CCA                                     | CAG CAA ACT GCT GGG TTA CAG                                  | 724                |
| 42   | CCT TGT CAT GGG TGA TAG CCA                                     | CAG CAA ACT GCT GGG TTA CAG                                  | 724                |
| 43   | CCT AGG CTT AGG GTT ATT G                                       | CAT TCT CTT GAC ATA CAG GG                                   | 365                |
| 44   | TGA AGG TTT GAG GTA GTT AC                                      | TCT AGA TAT TGA AAT CAT GGA                                  | 362                |
| 45   | AAC CAG AGT ATC TCT ACC TGC<br>TTA                              | ATT TTG TGC TCG TCG ATT CAT<br>GAG                           | 317                |
| 46   | TAC ATG TAT GTG TAG GAC AGC<br>ATG                              | TTT CCA CTC AGG CCA GAA CAA                                  | 256                |
| 47   | CTG ACT TCA ATA GAG GTT TCA G                                   | CAC CTA AAT GCA CTG ACT TGG                                  | 680                |
| 48   | CCT AGG AAG CTG GAA TGC TG                                      | CCC TTT ATG TTA GAG GCA CC                                   | 279                |
| 49   | CCC TTT TTC ATG GCA CAA GT                                      | GGA ATC CAC ACC CTG AGA AG                                   | 388                |
| 50   | GTA TGC TCC TAC TTG ACC TAA                                     | GTG AGT TCA AAC CCA TAT GTC                                  | 550                |
