# Supplementary material
Source: PubMed Central journal article supplement (PMC3520540)
Supplement: supp_M027193_jlr.M027193-4.pdf [file supp_M027193_jlr.M027193-4.pdf]

**Supplementary Table 2. Primer pairs used for site directed mutagenesis of the ABCA1-GFP cDNA pCIneo expression vector.**

| <b>Mutation</b> | <b>Primer</b> | <b>Primer sequence (5' → 3')</b>                                       |
|-----------------|---------------|------------------------------------------------------------------------|
| <i>p.A594T</i>  | Fwd           | CTG GGG GGG CTT <u>C</u> AC CTA CTT GCA GGA                            |
|                 | Rev           | TCC TGC AAG TAG <u>G</u> TG AAG CCC CCC CAG                            |
| <i>p.I659V</i>  | Fwd           | CTG TGA TCA TCA AGG <u>G</u> CG TCG TGT ATG AGA AGG AG                 |
|                 | Rev           | CTC CTT CTC ATA CAC <u>G</u> AC GCC CTT GAT GAT CAC AG                 |
| <i>p.R1068H</i> | Fwd           | GGA CCC TTA CTC <u>C</u> CA CAG GGG AAT ATG GG                         |
|                 | Rev           | CCC ATA TTC CCC <u>T</u> GT GGG AGT AAG GGT CC                         |
| <i>p.T1512M</i> | Fwd           | CGG ATT ATC TGG TGA AGA <u>T</u> GT ATG TGC AGA TCA TAG C              |
|                 | Rev           | GCT ATG ATC TGC ACA TAC <u>A</u> TC TTC ACC AGA TAA TCC G              |
| <i>p.Y1767D</i> | Fwd           | CCC CAG CAC AGC <u>C</u> GA TGT GGT GCT CAC                            |
|                 | Rev           | GTG AGC ACC ACA <u>T</u> CG GCT GTG CTG GGG                            |
| <i>p.N1800H</i> | Fwd           | CGA CAA TAA GCT GAA TAA TAT <u>C</u> CA TGA TAT CCT GAA GTC<br>CGT GTT |
|                 | Rev           | AAC ACG GAC TTC AGG ATA TCA <u>T</u> GG ATA TTA TTC AGC TTA<br>TTG TCG |
| <i>p.R2004K</i> | Fwd           | CAC AGA GCT GTT GAC TGG <u>G</u> AA AGA ACA CGT GGA                    |
|                 | Rev           | TCC ACG TGT TCT <u>T</u> TC CCA GTC AAC AGC TCT GTG                    |
| <i>p.A2028V</i> | Fwd           | AGG TTG GTG AGT GGG <u>T</u> GA TTC GGA AAC TGG G                      |
|                 | Rev           | CCC AGT TTC CGA ATC <u>A</u> CC CAC TCA CCA ACC T                      |
| <i>p.Q2239N</i> | Fwd           | TCT CAT TAC ACA AAA ACC <u>G</u> GA CAG TAG TGG ACG TTG C              |
|                 | Rev           | GCA ACG TCC ACT ACT GTC <u>C</u> GG TTT TTG TGT AAT GAG A              |
