# Supplementary material
Source: PubMed Central journal article supplement (PMC3520540)
Supplement: supp_M027193_jlr.M027193-5.pdf [file supp_M027193_jlr.M027193-5.pdf]

**Supplementary Table 3. Primers for qRT-PCR analysis**

| <b>Primer</b>    | <b>Primer sequence (5' → 3')</b> | <b>T<sub>m</sub></b> | <b>Amplicon size</b> |
|------------------|----------------------------------|----------------------|----------------------|
| <i>ABCA1 Fwd</i> | CAT CTC ATA GTA TGG AAG AAT G    | 51.6°C               | 133 bp               |
| <i>ABCA1 Rev</i> | CGT ACA ACT ATT GTA TAA CCA TCT  | 52.3°C               |                      |
| <i>GAPDH Fwd</i> | TTG GTA TCG TGG AAG GAC TCA      | 60.5°C               | 132 bp               |
| <i>GAPDH Rev</i> | CAG TAG AGG CAG GGA TGA TGT      | 59.2°C               |                      |
