# Supplementary material
Source: PubMed Central journal article supplement (PMC3520540)
Supplement: supp_M027193_jlr.M027193-6.pdf [file supp_M027193_jlr.M027193-6.pdf]

**Supplementary Table 4. Primers for cloning the ABCA1 promoter**

| <b>Target vector</b> | <b>Forward primer (5' → 3')</b>             | <b>Reverse primer (5' → 3')</b>             | <b>Amplicon size (bp)</b> |
|----------------------|---------------------------------------------|---------------------------------------------|---------------------------|
| <i>pCR2.1</i>        | TGT TCC TCT CGG GTC CTC T                   | ACT CAC TCT CGC TCG CAA TTA                 | 715                       |
| <i>pGL4.10</i>       | GCT TTG TTC CTC <u>TGA TAT CCT</u><br>CTG A | GCA GAA TTA <u>AGC TTA CTC ACT</u><br>CTC G | 733                       |

The engineered EcoRV and HindIII restriction sites in the forward and reverse pGL4.10 cloning primers respectively are underlined.
